# Supplementary material for: Effect of age at vaccination on the measles vaccine effectiveness and immunogenicity: systematic review and meta-analysis
Source: PubMed Central journal article supplement (PMC7104533; doi:10.1186/s12879-020-4870-x), 2020-03-29
Supplement: 12879_2020_4870_MOESM3_ESM.pdf [file 12879_2020_4870_MOESM3_ESM.pdf]

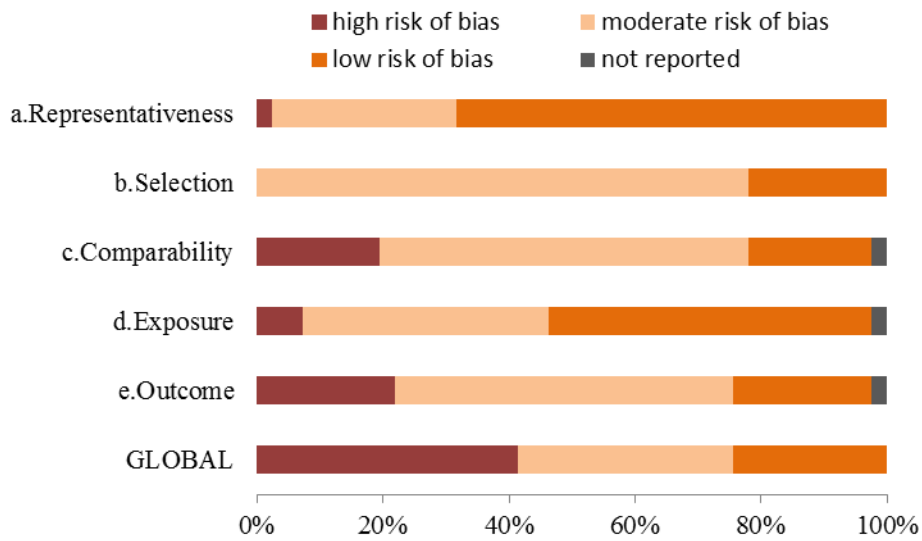

**Supplementary Figure 1: Risk of bias of the observational studies included in the effectiveness analysis (n=41)**

<sup>a</sup> Representativeness based on the description of the source population, the representativeness of the eligible population, the inclusion criteria and the percentage of participation.

<sup>b</sup> Selection of the compared groups from the same source and the response rate.

<sup>c</sup> Comparability of administered vaccine, time since vaccination, risk of exposure to measles, malnutrition and exposure to control measures between groups.

<sup>d</sup> Exposure assessment based on the method to ascertain vaccination status for all groups and the demonstration of no history of measles among no-cases.

<sup>e</sup> Outcome assessment based on the case definition and the completeness of case reporting.
