# Supplementary material for: Effect of age at vaccination on the measles vaccine effectiveness and immunogenicity: systematic review and meta-analysis
Source: PubMed Central journal article supplement (PMC7104533; doi:10.1186/s12879-020-4870-x), 2020-03-29
Supplement: 12879_2020_4870_MOESM4_ESM.pdf [file 12879_2020_4870_MOESM4_ESM.pdf]

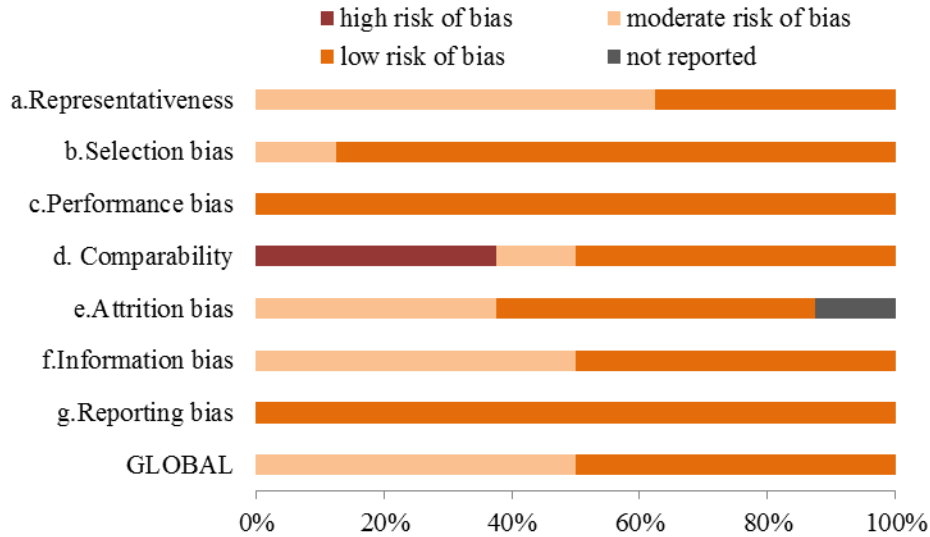

### A. Randomized Controlled Trials (n=8)

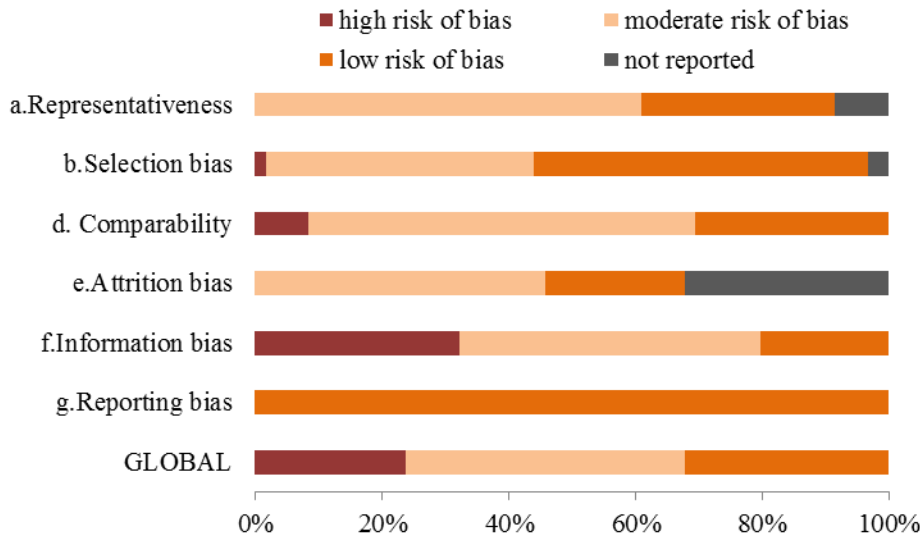

### B. Non-randomized Controlled Trials / Before-after studies (n=59)

## Supplementary Figure 2: Risk of bias of the experimental studies included in the immunogenicity analysis

<sup>a</sup> Representativeness based on the description of the source population, the representativeness of the eligible population, the inclusion criteria and the percentage of participation.

<sup>b</sup> Selection of the compared groups from the same source and the response rate.

<sup>c</sup> Blinding of study participants and personnel or no impact on the results

<sup>d</sup> Comparability of administered vaccine, time since vaccination, risk of exposure to measles, malnutrition and no control for maternal antibodies.

<sup>e</sup> Completeness of outcome data.

<sup>f</sup> Information bias assessment based on same vaccine strain and potency administered to all participants and laboratory method to detect antibodies.

<sup>g</sup> Possibility of selective outcome reporting
