# Supplementary material for: Effect of age at vaccination on the measles vaccine effectiveness and immunogenicity: systematic review and meta-analysis
Source: PubMed Central journal article supplement (PMC7104533; doi:10.1186/s12879-020-4870-x), 2020-03-29
Supplement: 12879_2020_4870_MOESM6_ESM.pdf [file 12879_2020_4870_MOESM6_ESM.pdf]

**Supplementary Table 3. Seroconversion after one dose of measles vaccine by age at first vaccination**

| Author, year<br>(strain) (ref)                | N <sup>1</sup> | Serocon<br>-version<br>dfn <sup>2</sup> | Seroconversion risk by age at MCV1 <sup>3</sup> [95%CI] |                     |                     |                     |                     |                  |                     |                  |     |
|-----------------------------------------------|----------------|-----------------------------------------|---------------------------------------------------------|---------------------|---------------------|---------------------|---------------------|------------------|---------------------|------------------|-----|
|                                               |                |                                         | <6                                                      | 6                   | 7-8                 | 9                   | 10-11               | 12               | 13-14               | 15               | >15 |
| Stewien, 1978<br>(Schwarz) [108]              | 38             | 4-fold                                  |                                                         |                     | 0.42<br>[0.14-0.70] | 0.79<br>[0.61-0.97] |                     | 1.00<br>[-]      |                     |                  |     |
| Mittal, 1979<br>(Schwarz) [109]               | 23             | 4-fold                                  |                                                         |                     |                     |                     | 0.82<br>[0.59-1]    |                  | 0.92<br>[0.76-1]    |                  |     |
| Shaoyuan, 1982 <sup>4</sup><br>(Jing55) [110] | 82             | 4-fold                                  | 0.20<br>[0.06-0.34]                                     |                     | 0.46<br>[0.26-0.66] | 0.75<br>[0.54-0.96] |                     | 0.92<br>[0.76-1] |                     |                  |     |
| Dequadros, 1983<br>(Moraten) [111]            | 1633           | 4-fold                                  |                                                         | 0.59<br>[0.54-0.64] | 0.76<br>[0.73-0.80] | 0.87<br>[0.83-0.91] | 0.94<br>[0.91-0.96] | 0.97<br>[0.94-1] |                     |                  |     |
| Ekunwe, 1985<br>(Moraten) [52]                | 108            | 4-fold                                  |                                                         | 0.74<br>[0.61-0.88] | 0.79<br>[0.65-0.93] | 0.86<br>[0.71-1]    |                     | 0.87<br>[0.69-1] |                     |                  |     |
| Kakakios, 1990 [112]<br>(Schwarz/Moraten)     | 329            | 4-fold                                  |                                                         |                     |                     |                     |                     | 0.97<br>[0.94-1] | 0.94<br>[0.91-0.97] | 0.98<br>[0.95-1] |     |
| Rogers, 1991<br>(E-Z) [113]                   | 39             | 4-fold                                  | 0.74<br>[0.58-0.91]                                     | 1.00<br>[-]         |                     | 1.00<br>[-]         |                     |                  |                     |                  |     |
| Abanamy, 1992<br>(Schwarz) [114]              | 78             | 4-fold                                  |                                                         | 0.56<br>[0.37-0.75] |                     | 0.70<br>[0.57-0.82] |                     |                  |                     |                  |     |
| Kaan, 1992<br>(Schwarz) [54]                  | 170            | 4-fold                                  | 0.58<br>[0.39-0.77]                                     |                     |                     | 0.70<br>[0.62-0.79] |                     |                  | 0.79<br>[0.67-0.92] |                  |     |
| Gans, 1998<br>(Moraten) [115]                 | 65             | 4-fold                                  |                                                         | 0.65<br>[0.46-0.85] |                     | 0.90<br>[0.77-1]    |                     | 1.00<br>[-]      |                     |                  |     |
| Gans, 2004<br>(Moraten) [73]                  | 130            | 4-fold                                  |                                                         | 0.86<br>[0.74-0.99] |                     | 0.95<br>[0.86-1]    |                     | 0.98<br>[0.94-1] |                     |                  |     |
| Miller, 1967<br>(Schwarz) [116]               | 46             | +/- PRE                                 | 0.73<br>[0.46-0.99]                                     |                     |                     | 1.00<br>[-]         |                     | 1.00<br>[-]      |                     |                  |     |
| Ruben, 1973<br>(LFA) [117]                    | 165            | +/- PRE                                 |                                                         | 0.61<br>[0.47-0.76] |                     | 0.81<br>[0.74-0.88] |                     |                  |                     |                  |     |
| Dick, 1975<br>(Moraten) [56]                  | 64             | +/- PRE                                 |                                                         | 0.23<br>[0-0.46]    | 0.52<br>[0.32-0.72] | 0.81<br>[0.64-0.98] |                     | 0.80<br>[0.45-1] |                     |                  |     |

|                                               |      |         |                     |                     |                     |                     |                     |                     |                     |                  |                  |  |
|-----------------------------------------------|------|---------|---------------------|---------------------|---------------------|---------------------|---------------------|---------------------|---------------------|------------------|------------------|--|
| Wallace, 1976<br>(Schwarz) [118]              | 136  | +/- PRE |                     |                     | 0.64<br>[0.47-0.80] |                     |                     |                     | 0.89<br>[0.83-0.95] |                  |                  |  |
| Guyer, 1977<br>(Schwarz) [57]                 | 21   | +/- PRE |                     | 0.50<br>[0.22-0.78] |                     |                     |                     | 0.89<br>[0.68-1]    |                     |                  |                  |  |
| Wilkins, 1979<br>(Moraten) [119]              | 851  | +/- PRE |                     | 0.32<br>[0.16-0.49] | 0.64<br>[0.50-0.78] | 0.72<br>[0.60-0.84] | 0.92<br>[0.86-0.98] | 0.95<br>[0.93-0.97] | 0.96<br>[0.91-1]    | 0.93<br>[0.79-1] | 0.95<br>[0.82-1] |  |
| Ogunmekan, 1981<br>(Moraten) [120]            | 77   | +/- PRE | 0.06<br>[0-0.16]    | 0.25<br>[0.08-0.42] | 0.40<br>[0.21-0.59] | 0.60<br>[0.30-0.90] |                     |                     |                     |                  |                  |  |
| Ogunmekan, 1981b<br>(Schwarz) [121]           | 171  | +/- PRE |                     | 0.56<br>[0.42-0.69] |                     | 0.55<br>[0.45-0.66] |                     | 0.40<br>[0.21-0.59] |                     |                  |                  |  |
| Shaoyuan, 1982 <sup>4</sup><br>(Jing55) [110] | 1070 | +/- PRE | 0.64<br>[0.55-0.74] |                     | 0.84<br>[0.79-0.89] | 0.94<br>[0.92-0.97] |                     | 0.97<br>[0.95-0.99] |                     |                  |                  |  |
| De Haas, 1983<br>(Sw/Moraten) [122]           | 56   | +/- PRE |                     |                     | 0.57<br>[0.31-0.83] | 0.87<br>[0.73-1]    |                     |                     | 0.84<br>[0.68-1]    |                  |                  |  |
| Sehgal, 1983<br>(Schwarz) [123]               | 99   | +/- PRE |                     | 0.80<br>[0.68-0.92] |                     |                     |                     | 0.83<br>[0.73-0.93] |                     |                  |                  |  |
| Climie, 1984 <sup>5</sup><br>(Schwarz) [124]  | 172  | +/- PRE |                     |                     |                     | 1.00<br>[-]         | 0.96<br>[0.88-1]    | 1.00<br>[-]         | 1.00<br>[-]         | 0.97<br>[0.93-1] |                  |  |
| Job, 1984<br>(Moraten) [125]                  | 181  | +/- PRE |                     | 0.87<br>[0.80-0.94] |                     | 0.97<br>[0.93-1]    |                     | 1.00<br>[-]         |                     |                  |                  |  |
| Chen, 1985<br>(Schwarz) [126]                 | 798  | +/- PRE |                     |                     |                     | 0.95<br>[0.91-0.99] | 0.95<br>[0.93-0.98] | 0.99<br>[0.97-1]    | 0.98<br>[0.97-0.99] |                  |                  |  |
| Halsey, 1985<br>(Moraten) [59]                | 333  | +/- PRE |                     | 0.45<br>[0.31-0.59] | 0.74<br>[0.65-0.83] | 0.84<br>[0.75-0.94] | 0.95<br>[0.90-0.99] | 1.00<br>[-]         |                     |                  |                  |  |
| Maluf, 1985<br>(NR) [61]                      | 223  | +/- PRE |                     | 0.50<br>[0.42-0.58] |                     | 0.52<br>[0.33-0.71] | 0.77<br>[0.61-0.93] | 0.70<br>[0.42-0.98] | 0.80<br>[0.55-1]    | 0.81<br>[0.62-1] |                  |  |
| Soerensen, 1985<br>(Schwarz) [72]             | 1206 | +/- PRE |                     |                     | 0.53<br>[0.49-0.56] | 0.75<br>[0.69-0.82] | 0.79<br>[0.67-0.90] |                     |                     |                  |                  |  |
| Lhuillier, 1989<br>(Schwarz) [127]            | 132  | +/- PRE | 0.96<br>[0.91-1]    |                     |                     | 0.98<br>[0.95-1]    |                     |                     |                     |                  |                  |  |
| Tidjani, 1989<br>(AIK-C) [128]                | 130  | +/- PRE | 0.96<br>[0.93-1]    |                     |                     | 0.87<br>[0.73-1]    |                     |                     |                     |                  |                  |  |
| Huang, 1990                                   | 160  | +/- PRE |                     |                     |                     |                     |                     | 0.88                |                     | 1.00             |                  |  |



|                                      |      |                     |                     |                     |                                  |                     |                                  |                     |  |                     |  |
|--------------------------------------|------|---------------------|---------------------|---------------------|----------------------------------|---------------------|----------------------------------|---------------------|--|---------------------|--|
| Vesikari, 2012<br>(Moraten) [46]     | 1401 | +/- PRE             |                     |                     |                                  | 0.73<br>[0.69-0.77] | 0.88 <sup>9</sup><br>[0.85-0.91] | 0.90<br>[0.87-0.93] |  |                     |  |
| Martins, 2014<br>(E-Z) [51]          | 489  | +/- PRE             | 0.87<br>[0.82-0.92] |                     |                                  | 0.96<br>[0.93-0.98] |                                  |                     |  |                     |  |
| WHO, 1977<br>(Schwarz) [48]          | 196  | 4 fold &<br>+/- PRE | 0.59<br>[0.47-0.71] | 0.57<br>[0.41-0.74] | 0.93<br>[0.86-1]                 |                     | 1.00 <sup>9</sup><br>[-]         |                     |  |                     |  |
| Saha, 1985<br>(Schwarz) [60]         | 769  | 4 fold &<br>+/- PRE |                     | 0.33<br>[0.19-0.46] |                                  | 0.53<br>[0.46-0.59] |                                  | 0.42<br>[0.33-0.50] |  | 0.41<br>[0.36-0.46] |  |
| Diaz-Ortega, 1986<br>(Schwarz) [139] | 237  | 4 fold &<br>+/- PRE |                     |                     | 0.55 <sup>6</sup><br>[0.33-0.77] | 0.67<br>[0.54-0.80] | 0.58<br>[0.46-0.70]              | 0.67<br>[0.54-0.81] |  | 0.68<br>[0.55-0.80] |  |
| Deivanayagam, 1990<br>(Schwarz) [53] | 71   | 4 fold &<br>+/- PRE |                     | 0.48<br>[0.26-0.69] | 0.50<br>[0.36-0.64]              |                     |                                  |                     |  |                     |  |
| Markowitz, 1990<br>(Schwarz) [140]   | 274  | 4 fold &<br>+/- PRE | 0.57<br>[0.49-0.65] |                     | 0.85<br>[0.79-0.91]              |                     |                                  |                     |  |                     |  |
| Markowitz, 1990<br>(E-Z) [140]       | 322  | 4 fold &<br>+/- PRE | 0.77<br>[0.70-0.84] |                     | 0.96<br>[0.94-0.99]              |                     |                                  |                     |  |                     |  |
| Bolotovskii, 1994<br>(AIK-C) [141]   | 281  | 4 fold &<br>+/- PRE |                     | 0.83<br>[0.77-0.88] |                                  | 0.94<br>[0.89-0.97] |                                  |                     |  |                     |  |
| Bolotovskii, 1994<br>(E-Z) [141]     | 296  | 4 fold &<br>+/- PRE |                     | 0.67<br>[0.59-0.74] |                                  | 0.91<br>[0.86-0.95] |                                  |                     |  |                     |  |
| Bolotovskii, 1994<br>(L16) [141]     | 288  | 4 fold &<br>+/- PRE |                     | 0.75<br>[0.68-0.81] |                                  | 0.95<br>[0.91-0.98] |                                  |                     |  |                     |  |
| Bolotovskii, 1994<br>(Schwarz) [141] | 301  | 4 fold &<br>+/- PRE |                     | 0.66<br>[0.58-0.73] |                                  | 0.95<br>[0.91-0.98] |                                  |                     |  |                     |  |
| Ndumbe, 1995<br>(Schwarz) [142]      | 45   | 4 fold &<br>+/- PRE | 0.57<br>[0.39-0.75] | 0.71<br>[0.49-0.92] |                                  |                     |                                  |                     |  |                     |  |
| Ndumbe, 1995<br>(Conraught) [142]    | 68   | 4 fold &<br>+/- PRE | 0.59<br>[0.44-0.74] | 0.82<br>[0.64-1]    | 0.83<br>[0.62-1]                 |                     |                                  |                     |  |                     |  |
| Klinge, 2000<br>(Moraten) [4]        | 118  | 4 fold &<br>+/- PRE |                     |                     |                                  | 0.85<br>[0.74-0.95] |                                  | 0.97<br>[0.90-1]    |  | 1<br>[-]            |  |
| Redd, 2004<br>(Moraten) [5]          | 990  | 4 fold &<br>+/- PRE |                     |                     |                                  | 0.87<br>[0.84-0.91] |                                  | 0.95<br>[0.93-0.97] |  | 0.98<br>[0.97-1]    |  |
| He, 2014                             | 280  | 4 fold &            |                     |                     | 0.99 <sup>6</sup>                |                     |                                  | 0.99                |  |                     |  |

|                                    |     |              |                                   |                                   |                     |                     |                     |          |                     |  |                     |  |
|------------------------------------|-----|--------------|-----------------------------------|-----------------------------------|---------------------|---------------------|---------------------|----------|---------------------|--|---------------------|--|
| (Hu 191) [47]                      |     | +/- PRE      |                                   |                                   | [0.97-1]            |                     |                     |          | [0.96-1]            |  |                     |  |
| Gendrel, 1988<br>(Schwarz) [64]    | 37  | Other<br>(1) | 0.45 <sup>10</sup><br>[0.23-0.67] | 0.41 <sup>11</sup><br>[0.18-0.65] |                     |                     |                     |          |                     |  |                     |  |
| Hussey, 1996<br>(Schwarz) [143]    | 45  | Other<br>(2) |                                   | 0.92<br>[0.81-1]                  |                     | 0.95<br>[0.86-1]    |                     |          |                     |  |                     |  |
| Lee, 1983<br>(Moraten) [144]       | 113 | +            |                                   | 0.82<br>[0.64-1]                  | 0.93<br>[0.84-1]    | 1<br>[-]            | 1<br>[-]            | 1<br>[-] |                     |  |                     |  |
| McGraw, 1986<br>(Moraten) [62]     | 111 | +            |                                   |                                   | 0.88<br>[0.77-0.99] | 0.90<br>[0.80-1]    | 0.88<br>[0.76-1]    |          |                     |  | 0.95<br>[0.86-1.04] |  |
| Swami, 1987<br>(Schwarz) [63]      | 60  | +            | 0.43<br>[0.22-0.64]               |                                   |                     | 0.73<br>[0.54-0.91] |                     |          | 0.64<br>[0.42-0.87] |  |                     |  |
| Berry, 1992 (EZ)<br>[55]           | 239 | +            | 0.67<br>[0.58-0.76]               |                                   |                     | 0.94<br>[0.90-0.98] |                     |          |                     |  |                     |  |
| Sakatoku, 1994<br>(Schwarz) [146]  | 159 | +            | 0.46<br>[0.31-0.60]               | 0.87<br>[0.69-1]                  | 0.93<br>[0.88-0.99] | 0.92<br>[0.78-1]    | 0.91<br>[0.83-0.99] |          |                     |  |                     |  |
| Garly, 2001<br>(EZ) [50]           | 292 | +            |                                   | 0.95<br>[0.90-1]                  |                     | 0.99<br>[0.97-1]    |                     |          |                     |  |                     |  |
| Garly, 2001<br>(Schwarz) [50]      | 416 | +            |                                   | 0.78<br>[0.70-0.86]               |                     | 0.97<br>[0.95-0.99] |                     |          |                     |  |                     |  |
| Zanetta, 2001<br>(Biken-CAM) [146] | 290 | +            |                                   | 0.31<br>[0.23-0.39]               | 0.44<br>[0.37-0.52] |                     |                     |          |                     |  |                     |  |
| Fowlkes, 2011<br>(EZ) [45]         | 988 | +            |                                   | 0.62<br>[0.58-0.66]               |                     | 0.76<br>[0.72-0.80] |                     |          |                     |  |                     |  |

Abbreviations: CI=Confidence interval; E-Z=Edmonston-Zagreb; NR=Not reported; MCV1= dose one of measles-containing vaccine

<sup>1</sup> Number of cases for the calculation of the age effect

<sup>2</sup> 4-fold= fourfold increase in paired samples pre and post-vaccination; +/-PRE= seropositivity among seronegative pre-vaccination; += seropositivity among all participants; other(1)= twofold increase; other(2)= fourfold rise two weeks after immunization or twofold rise three months after immunization or titer >200 mIU/ml;

<sup>3</sup> By age in months of administration of MCV1

<sup>4</sup> Data presented separately for seronegative and seropositive pre-vaccination

<sup>5</sup> Age categories: 8.5 to 9.4 months; 9.5 to 11.4 months; 11.5 to 12.4 months; 12.5 to 14.4 months; 14.5 to 23 months

<sup>6</sup>8 months

<sup>7</sup>7 months

<sup>8</sup>8 to 15 months

<sup>9</sup>11 months

<sup>10</sup>3 to 4 months

<sup>11</sup>5 to 7 months
