# Supplementary material for: Effect of age at vaccination on the measles vaccine effectiveness and immunogenicity: systematic review and meta-analysis
Source: PubMed Central journal article supplement (PMC7104533; doi:10.1186/s12879-020-4870-x), 2020-03-29
Supplement: 12879_2020_4870_MOESM8_ESM.pdf [file 12879_2020_4870_MOESM8_ESM.pdf]

### A. Measles Risk Ratio

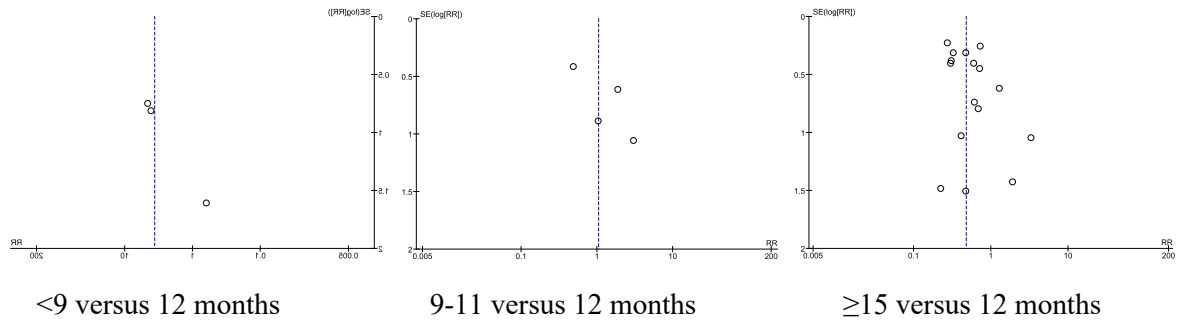

### B. Measles Odds Ratio

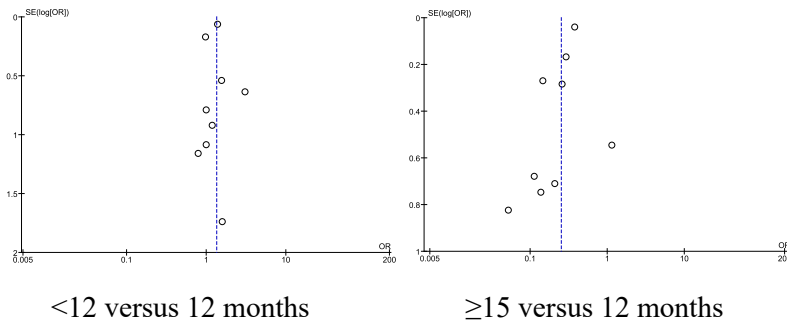

### C. Seroconversion Prevalence Ratio

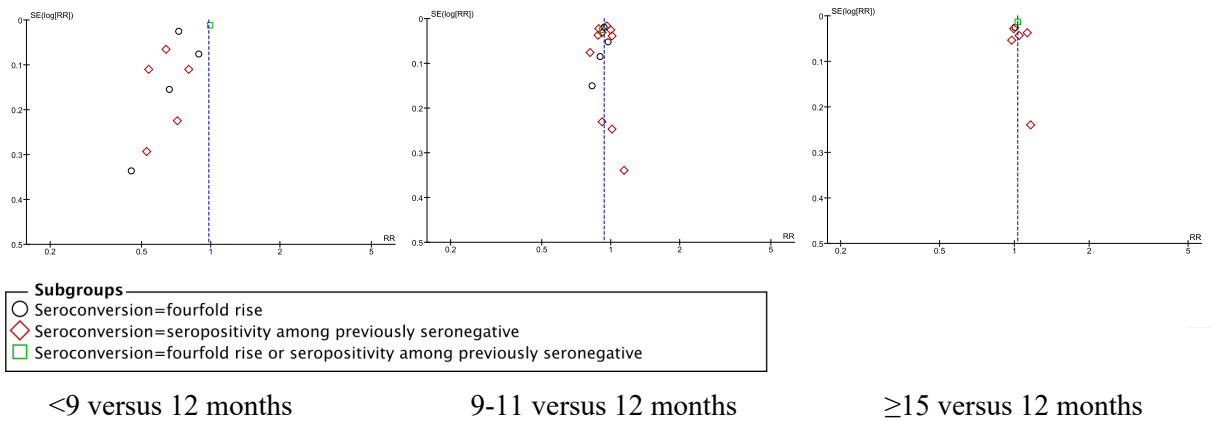

Supplementary Figure 5. Funnel plots for each outcome
